# Supplementary material for: Terahertz control and timing correlations in a transmission electron microscope
Source: PubMed Central journal article supplement — Sci Adv. 2024 Jun 26;10(26):eadl6543. doi: 10.1126/sciadv.adl6543 (PMC11204200; doi:10.1126/sciadv.adl6543), 2024-06-26
Supplement: sciadv.adl6543_sm.pdf [file sciadv.adl6543_sm.pdf]

Supplementary Materials for  
**Terahertz control and timing correlations in a transmission  
electron microscope**

Joel Kuttruff *et al.*

Corresponding author: Andrey Ryabov, [andrey.ryabov@uni-konstanz.de](mailto:andrey.ryabov@uni-konstanz.de); Peter Baum, [peter.baum@uni-konstanz.de](mailto:peter.baum@uni-konstanz.de)

*Sci. Adv.* **10**, eadl6543 (2024)  
DOI: 10.1126/sciadv.adl6543

**This PDF file includes:**

Figs. S1 to S6

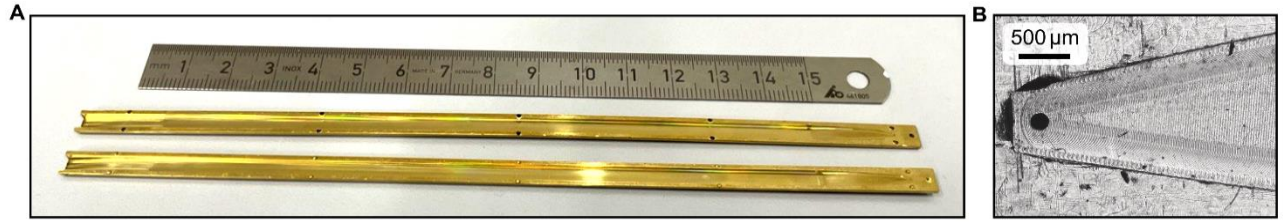

**Fig. S1.**

Fabricated waveguide structures. **A**, Photograph of the upper and lower half. **B**, Optical microscope image of the terahertz-electron interaction region.

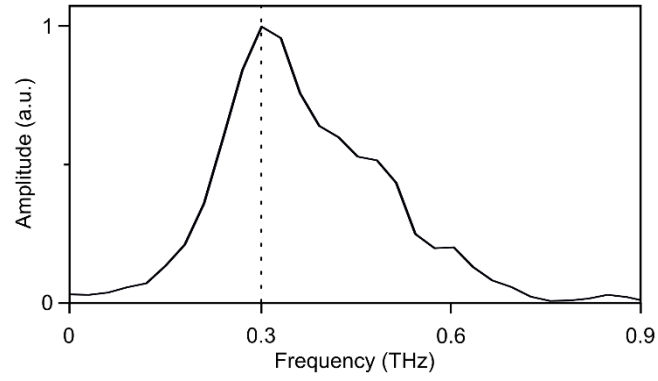

**Fig. S2.**

Terahertz spectrum obtained by Fourier transformation of the measured electron energy modulation as shown in Fig. 2A.

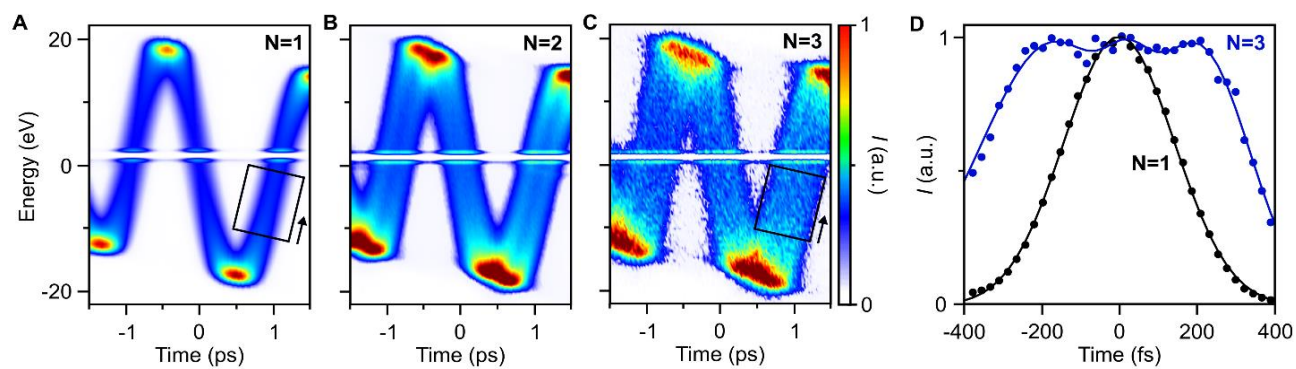

**Fig. S3.**

Three-electron correlations. **A-C**, Measured energy spectrograms for one-electron states ( $N = 1$ ), for two-electron states ( $N = 2$ ) and for three-electron states ( $N = 3$ ). Black rectangle, region of interest for further analysis. **D**, Evaluated electron arrival times (sum of the spectrogram along the black rectangle) for  $N = 1$  (black) and  $N = 3$  (blue). Dots, experimental data; solid lines, Gaussian fits.

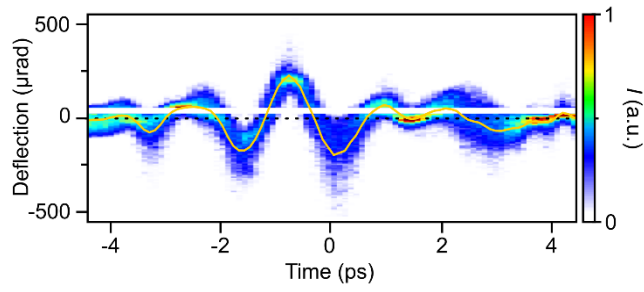

**Fig. S4.**

Raw data of the deflection trace shown in Fig. 2B. For each time step, we evaluate the beam position as the weighted centroid of the measured intensity profile (yellow).

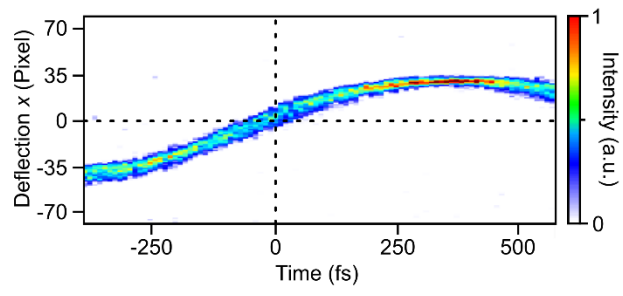

**Fig. S5.**  
Example for a streaking trace at a shifted defocus.

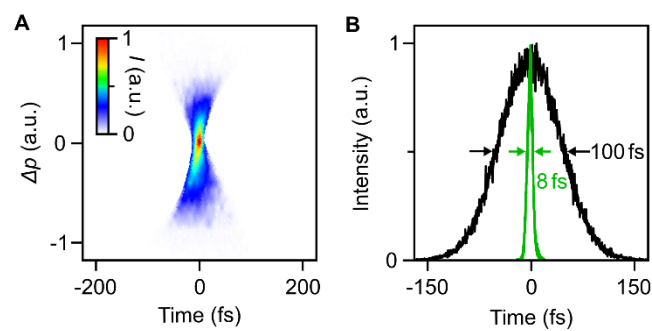

**Fig. S6.**

Numerical simulation of terahertz pulse compression for shorter initial pulses. **A**, Resulting longitudinal phase space in the momentum-time domain at the temporal focus for input pulses of 100 fs duration. **B**, Simulated temporal pulse profile before (black) and after (green) terahertz compression.
